# Supplementary material
Source: PubMed Central journal article supplement (PMC10621399)
Supplement: NIHPPrs3001450v4-supplement-1.pdf [file NIHPPrs3001450v4-supplement-1.pdf]

## Tables

| <b>Supplementary Table 1: Disability Weights for MPS III Multistage Model</b>      |                |                |                |
|------------------------------------------------------------------------------------|----------------|----------------|----------------|
| <b>Comorbidity (Disability Weight)</b>                                             | <b>Stage 1</b> | <b>Stage 2</b> | <b>Stage 3</b> |
| mild developmental delay (0.043)[3, 25, 26]                                        | *              |                |                |
| recurrent ear, nose and throat disease (0.027)[27, 28]                             | *              |                |                |
| bowel disturbance [mild] (0.074)[1, 4]                                             | *              |                |                |
| moderate hearing loss due to age-related and other hearing loss (0.017) [27, 28]   | *(50%)         |                |                |
| hyperactivity (0.045)[25, 29, 30]                                                  |                | *              |                |
| sleep disturbances [severe] (0.126)[25, 31]                                        |                | *              | *              |
| bowel disturbance [moderate] (0.188)[1, 4]                                         |                | *              |                |
| moderate developmental delay (0.1)[25]                                             |                | *              |                |
| severe hearing loss due to age-related and other hearing loss (0.158) [4, 27, 28]  |                | *(50%)         |                |
| severe loss of intellectual processes and motor function (0.402)[26, 29-31]        |                |                | *              |
| bowel disturbance [severe] (0.247) [1, 4]                                          |                |                | *              |
| severe developmental delay (0.16)[26]                                              |                |                | *              |
| complete hearing loss due to age-related and other hearing loss (0.215)[4, 27, 28] |                |                | *(50%)         |
| less severe epilepsy (0.263)[32-36]                                                |                |                | *(40%)         |
| <b>Cumulative Disability Weight (Multiplicative Comorbidity Method)</b>            | 0.149          | 0.357          | 0.698          |

| <b>Supplementary Table 2: Caregiver Risk Increase</b> | <b>Depression</b> |            | <b>Anxiety</b> |            | <b>PTSD</b> |            |
|-------------------------------------------------------|-------------------|------------|----------------|------------|-------------|------------|
|                                                       | <b>OR</b>         | <b>eRR</b> | <b>OR</b>      | <b>eRR</b> | <b>OR</b>   | <b>eRR</b> |
| <b>Mother</b>                                         | 2.90[37]          | 2.42       | 2.42[37]       | 1.91       | 5.08[37]    | 4.19       |
| <i>US Baseline Prevalence</i>                         | 10.4%[42]         |            | 19.0% [43]     |            | 5.2%[44]    |            |
| <i>Absolute Risk Increase for MPS III</i>             | 14.8%             |            | 17.2%          |            | 16.6%       |            |
| <b>Father</b>                                         | 2.42[37]          | 2.25       | NS[37]         | NS         | 7.18[37]    | 6.46       |
| <i>US Baseline Prevalence</i>                         | 5.5%[42]          |            | 11.9%[43]      |            | 1.8%[44]    |            |
| <i>Absolute Risk Increase for MPS III</i>             | 6.8%              |            | NS             |            | 9.8%        |            |

| <b>Supplementary Table 3: DALYs per MPS III Birth per Patient</b> | <b>Males Total (YLL, YDL)</b> | <b>Females Total (YLL, YDL)</b> |
|-------------------------------------------------------------------|-------------------------------|---------------------------------|
| <b>MPS IIIA</b>                                                   | 55.8 (49.98, 5.50)            | 58.18 (51.78, 5.50)             |
| <b>MPS IIIB</b>                                                   | 54.46 (46.29, 8.07)           | 57.06 (48.09, 8.07)             |
| <b>MPS IIIC</b>                                                   | 53.1 (41.77, 11.23)           | 55.7 (43.57, 11.23)             |
| <b>MPS IIID</b>                                                   | 55.08 (48.34, 6.64)           | 57.68 (50.14, 6.64)             |

| <b>DALYs per MPS III Birth (Caregivers)</b> | <b>Father</b> | <b>Mother</b> |
|---------------------------------------------|---------------|---------------|
| <b>All Subtypes</b>                         | 2.08          | 4.40          |

| <b>Supplementary Table 4: Caregiver DALYs by Disease Comorbidity (Disability Weight)</b> |               |               |
|------------------------------------------------------------------------------------------|---------------|---------------|
| <b>DALYs per MPS III Birth</b>                                                           | <b>Father</b> | <b>Mother</b> |
| Moderate major depressive disorder (0.396) [19, 37]                                      | 0.678*        | 1.464*        |
| Moderate Anxiety Disorder (0.133) [19, 37]                                               | N/A           | 0.572*        |
| PTSD (0.57) [19, 37]                                                                     | 1.401*        | 2.362*        |
| *Calculations derived from eRR using methods described in main text.                     |               |               |
